# Supplementary material for: Uniting Young's modulus and the flexibility of solid-state electrolytes for high-performance Li-batteries at room temperature
Source: Royal Society of Chemistry journal article supplement (doi:10.1039/d3dt02571c), 2023-01-01
Supplement: d3dt02571c1.pdf [file d3dt02571c1.pdf]

## Supporting Information

### **Uniting Young's Modulus and Flexibility of Solid-State Electrolyte for High-Performance Li-Batteries at room temperature**

Haitao Zhao<sup>1</sup>, Yan Zhang<sup>1</sup>, Zehua Zhao<sup>1</sup>, Zhuangzhuang Xue<sup>1</sup>, and Lei Li<sup>1\*</sup>

<sup>1</sup>State Key Laboratory for Mechanical Behavior of Materials, Xi'an Jiaotong

University, No.28, Xianning West Road, Xi'an, Shaanxi, 710049, China

Email: [l-li@xjtu.edu.cn](mailto:l-li@xjtu.edu.cn)

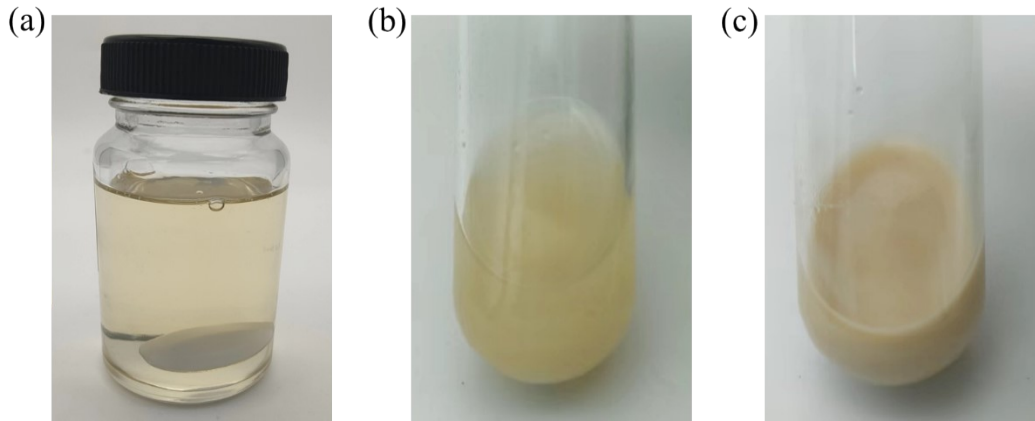

**Fig. S1.** Digital images of (a) SPE solution, (b) CIP slurry, (c) PIC slurry.

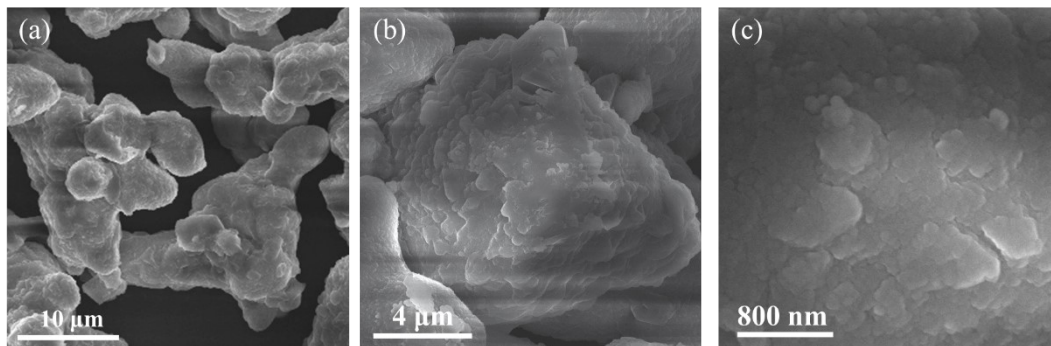

**Fig. S2.** (a-c) FE-SEM image of LLZTO particles at different magnification.

As shown in Fig. S2a, LLZTO was an irregular particle. And the surface of LLZTO particles was scaly (Fig. S2b,c).

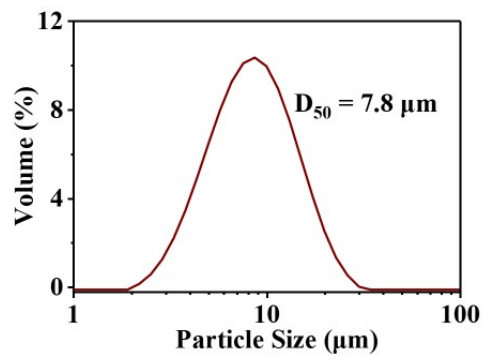

**Fig. S3.** The particle size distribution of LLZTO particles. The  $D_{50}$  of LLZTO is 7.8 μm.

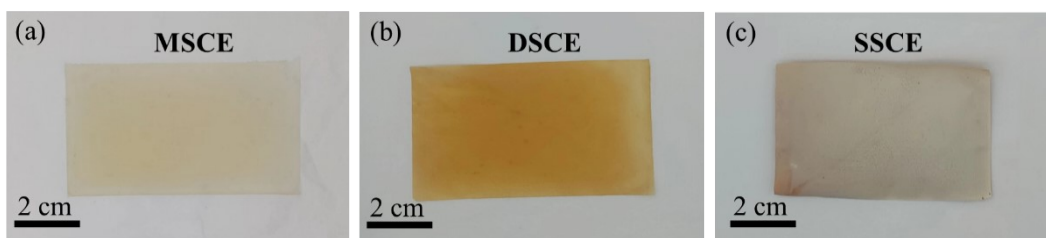

**Fig. S4.** Digital images of (a) MSCE, (b) DSCE, and (c) SSCE.

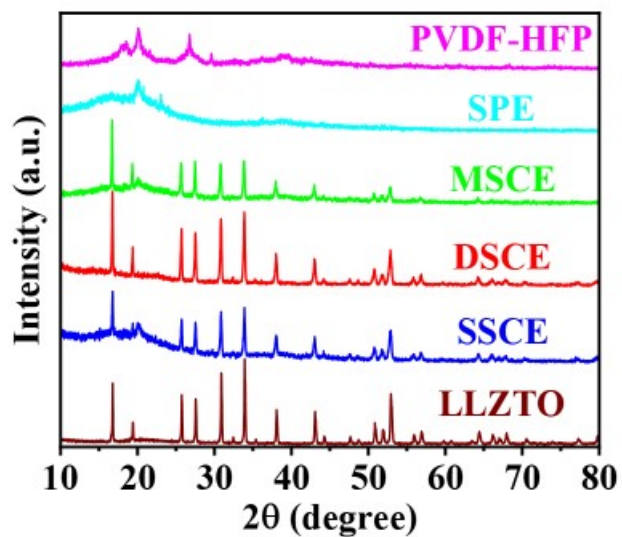

**Fig. S5.** XRD patterns of PVDF-HFP, SPE, MSCE, DSCE, SSCE and LLZTO particles.

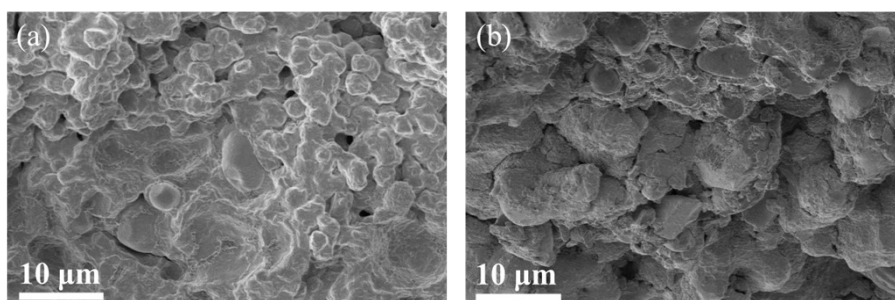

**Fig. S6.** Cross-sectional FE-SEM images of (a) the interphase between PIC layer and CIP layer, (b) the PIC layer in SSCE.

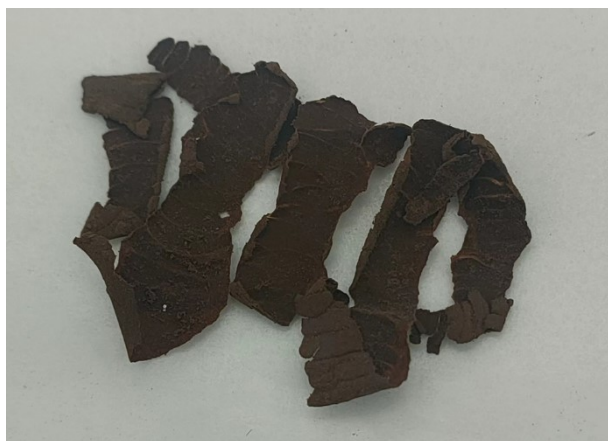

**Fig. S7.** Digital image of fractured, incomplete PIC with extremely poor flexibility.

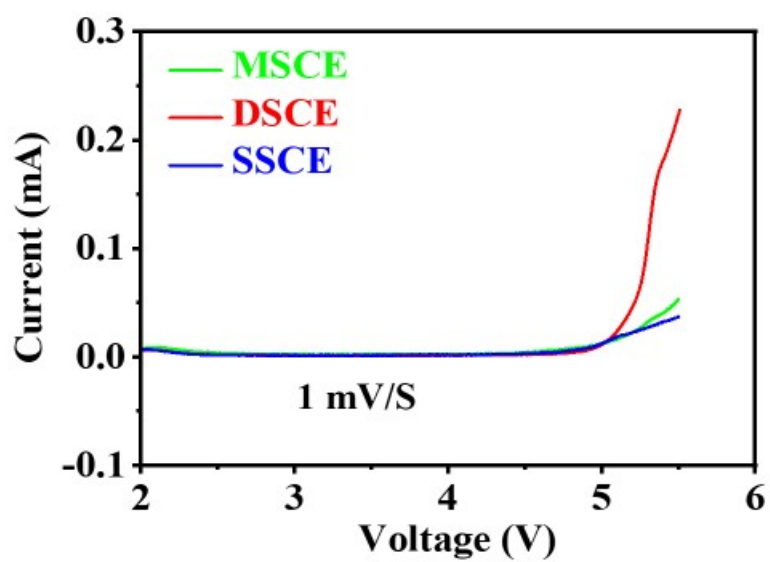

**Fig. S8.** Linear sweep voltammogram curves of MSCE, DSCE and SSCE.

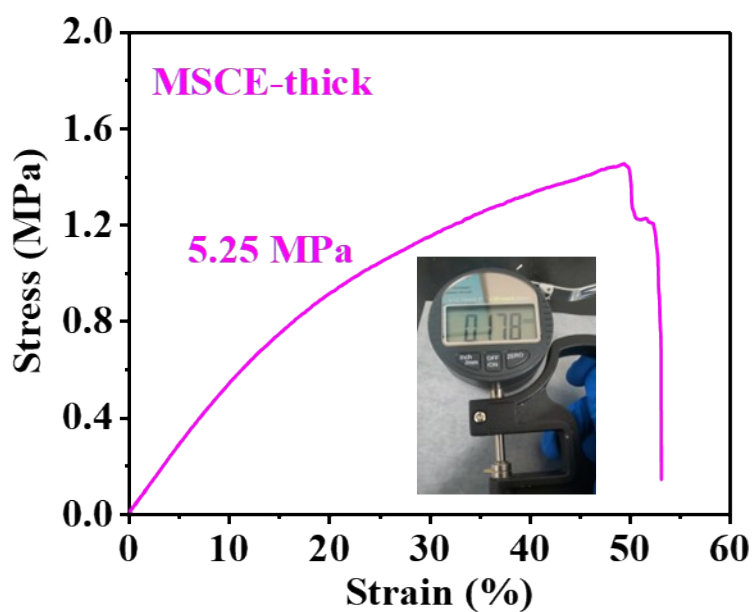

**Fig. S9.** Stress–strain curves and Digital image of the thickness of MSCE-thick.

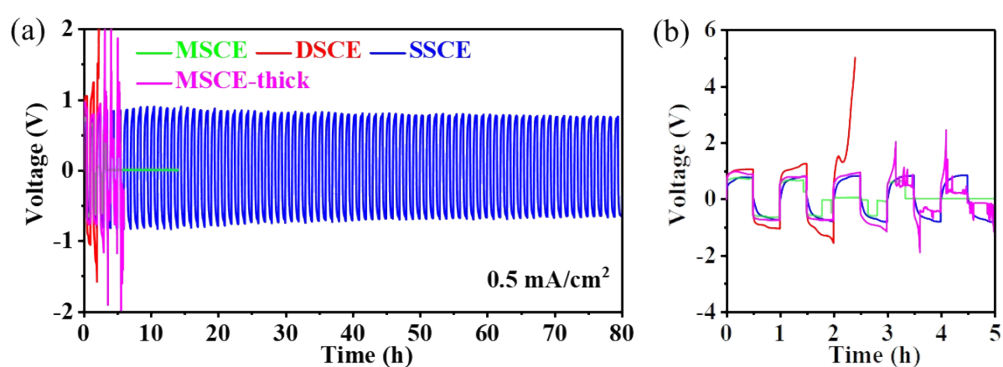

**Fig. S10.** Galvanostatic cycling measurements of Li|MSCE|Li, Li|DSCE|Li, Li|SSCE|Li and Li|MSCE-thick|Li at 0.5 mA/cm<sup>2</sup> with 0.5 h stripping and 0.5 h plating per cycle. (a) The voltage profiles, and (b) local view of voltage profiles at 0-4 h.

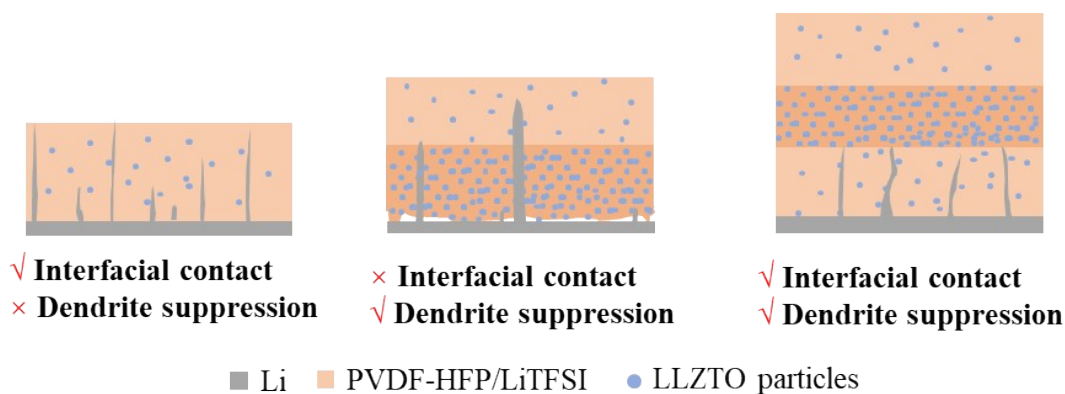

**Fig. S11.** Schematic illustration of MSCE, DSCE and SSCE suppressing Li dendrite growth and enhancing contact with electrodes.

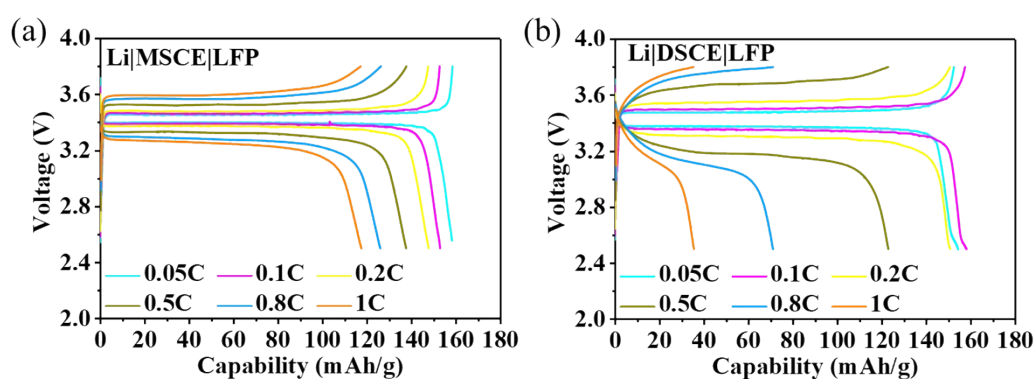

**Fig. S12.** Charge/discharge curves of (a) Li|MSCE|LFP; and (b) Li|DSCE|LFP at various current rates from 0.05 to 1C at 25 °C.

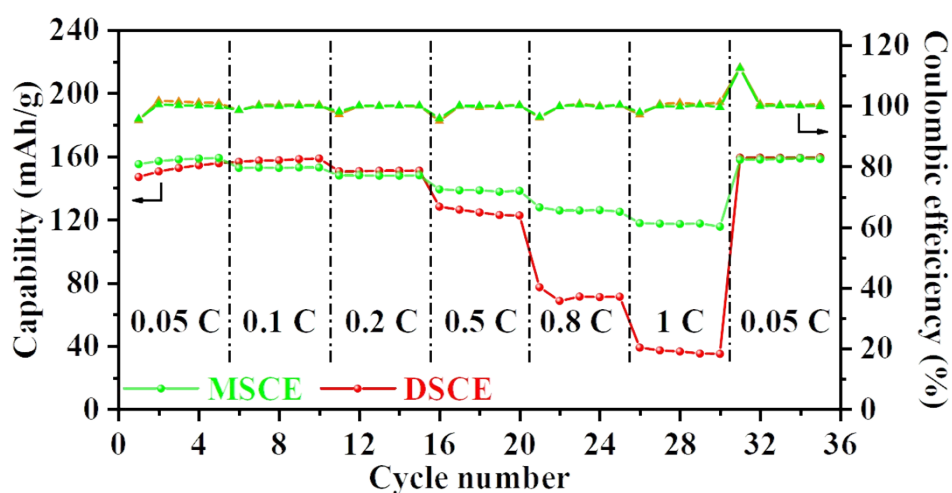

**Fig. S13.** The rate performance of Li|MSCE|LFP and Li|DSCE|LFP at various current rates from 0.05 to 1C at 25 °C.

**Table S1.** Comparisons of ionic conductivity solid-state electrolytes and cycling performance of all-solid-state batteries using LiFePO<sub>4</sub> as cathode active material.

| solid-state electrolytes                                                 | working temperature (°C) | ionic conductivity (10 <sup>-4</sup> S/cm) | voltage range (V) | rate | initial discharge capacity (mA h/g) | capacity retention (%) | ref.      |
|--------------------------------------------------------------------------|--------------------------|--------------------------------------------|-------------------|------|-------------------------------------|------------------------|-----------|
| SSCE                                                                     | 25                       | 4.57                                       | 2.5-3.8           | 0.5C | 130.3                               | 98.8 (450 cycles)      | This work |
| sandwich structure PEO/PVDF-HFP@LLZTO/PEO                                | 40                       | 2.86                                       | 2.5-4.0           | 0.2C | 147.2                               | 83.6 (140 cycles)      | S1        |
| sandwich structure PEO@20 vol% LLZTO/PEO@80 vol% LLZTO/PEO@20 vol% LLZTO | 30                       | 1.60                                       | 2.8-3.8           | 0.1C | 120                                 | 82.4 (200 cycles)      | S2        |
| the electrospun sandwich-like membrane PVDF-HFP/PAN/PVDF-HFP             | 30                       | 2.15                                       | 2.8-4.0           | 0.5C | 120                                 | 82 (400 cycles)        | S3        |
| sandwich structure PPC/polypropylene separator /PPC@SN                   | 25                       | 2.18                                       | 2.6-4.2           | 0.1C | 140                                 | /                      | S4        |
| sandwich structure PVDF/polypropylene separator /PVDF                    | 25                       | 1.53                                       | 2.8-3.6           | 0.3C | 134                                 | 97.8 (140 cycles)      | S5        |
| monolayered structure PVA@PAN@20 wt % LATP @ 10 wt% SN                   | 25                       | 1.13                                       | 2.0-4.0           | 0.5C | 119.4                               | 90.5 (100 cycles)      | S6        |

- [S1] Z. Xie, Z. Wu, X. An, X. Yue, P. Xiaokaiti, A. Yoshida, A. Abudula and G. Guan, *J. Membr. Sci.*, 2020, **596**, 117739.
- [S2] H. Huo, Y. Chen, J. Luo, X. Yang, X. Guo and X. Sun, *Adv. Energy Mater.*, 2019, **9**, 1804004.
- [S3] D. Zhang, X. Xu, S. Ji, Z. Wang, Z. Liu, J. Shen, R. Hu, J. Liu and M. Zhu, *ACS Appl. Mater. Interfaces*, 2020, **12**, 21586-21595.
- [S4] H. Yue, J. Li, Q. Wang, C. Li, J. Zhang, Q. Li, X. Li, H. Zhang and S. Yang, *ACS Sustainable Chem. Eng.*, 2018, **6**, 268-274.
- [S5] K. Shi, Z. Xu, M. Huang, L. Zou, D. Zheng, Z. Yang and W. Zhang, *J. Membr. Sci.*, 2021, **638**, 119713.
- [S6] H. K. Tran, Y.-S. Wu, W.-C. Chien, S.-h. Wu, R. Jose, S. J. Lue and C.-C. Yang, *ACS Appl. Energy Mater.*, 2020, **3**, 11024-11035.
